# Supplementary material for: First-principles study on screening doped TiO2(B) as an anode material with high conductivity and low lithium transport resistance for lithium-ion batteries
Source: Royal Society of Chemistry journal article supplement (doi:10.1039/c9cp01885a), 2019-01-01
Supplement: c9cp01885a1.pdf [file c9cp01885a1.pdf]

## Supporting Information

### First-principle study on screening doped TiO<sub>2</sub>(B) as anode material with high conductivity and low lithium transport resistance for lithium-ion batteries

Denglei Gao,<sup>ab</sup> Yanlei Wang,<sup>b</sup> Jing Kong,<sup>b</sup> Feng Huo,<sup>b</sup> Sufan Wang,<sup>\*a</sup> Hongyan He<sup>\*b</sup> and

Suojiang Zhang<sup>b</sup>

<sup>a</sup>College of Chemistry and Material Science, The Key Laboratory of Functional Molecular Solids, Ministry of Education, Anhui Laboratory of Molecule-Based Materials, Anhui Normal University, Wuhu 241000, PR China. E-mail: sfwang@mail.ahnu.edu.cn

<sup>b</sup>Beijing Key Laboratory of Ionic Liquids Clean Process, CAS Key Laboratory of Green Process and Engineering, State Key Laboratory of Multiphase Complex Systems, Institute of Process Engineering, Chinese Academy of Sciences, Beijing 100190, PR China. E-mail: hyhe@ipe.ac.cn

**Tab. S1** Experimental and calculated (GGA and GGA+U) structural lattice parameters of TiO<sub>2</sub>(B).

| Parameter                    | Literature <sup>1</sup> | GGA     | GGA+U   |
|------------------------------|-------------------------|---------|---------|
| <i>a</i> (Å)                 | 12.1787                 | 12.3030 | 12.5042 |
| <i>b</i> (Å)                 | 3.7412                  | 3.7849  | 3.8918  |
| <i>c</i> (Å)                 | 6.5249                  | 6.6256  | 6.6304  |
| <i>V</i> (Å <sup>3</sup> )   | 284.22                  | 295.16  | 308.45  |
| Density (g/cm <sup>3</sup> ) | 3.733                   | 3.595   | 3.440   |

**Tab. S2** The four inequalities of O<sub>v</sub> form the formation energy  $E_{form}$ , Bader charge, average bond length and band gap.

| Structure          | Formation energy (eV) |                     | Bader    | Average       | Band   |
|--------------------|-----------------------|---------------------|----------|---------------|--------|
|                    | $E_{form}$ (Ti-rich)  | $E_{form}$ (O-rich) | Charge/e | bond length/Å | gap/eV |
| O <sub>v-br</sub>  | 0.64                  | 5.02                | -0.91    | 1.84          | 2.55   |
| O <sub>v-3f1</sub> | 0.29                  | 4.68                | -1.04    | 1.96          | 2.13   |
| O <sub>v-3f2</sub> | 0.62                  | 5.01                | -1.01    | 1.94          | 2.25   |
| O <sub>v-4f</sub>  | 0.50                  | 4.89                | -1.09    | 2.00          | 1.77   |

**Tab. S3** The lattice parameters of pure and different dopants in TiO<sub>2</sub>(B) using GGA method.

| Structure | Lattice constants(Å) |        |         | Volume<br>(Å <sup>3</sup> ) | $\Delta V$<br>(%) |
|-----------|----------------------|--------|---------|-----------------------------|-------------------|
|           | a                    | b      | c       |                             |                   |
| Pure      | 12.3262              | 7.5614 | 13.2609 | 1182.33                     | -                 |
| N-doped   | 12.3295              | 7.5818 | 13.2336 | 1184.08                     | 0.15              |
| P-doped   | 12.3457              | 7.7082 | 13.1023 | 1193.09                     | 0.91              |
| As-doped  | 12.2695              | 7.6408 | 13.3193 | 1197.48                     | 1.28              |
| F-doped   | 12.2996              | 7.5865 | 13.2855 | 1186.66                     | 0.37              |
| Cl-doped  | 12.2432              | 7.6402 | 13.3579 | 1197.20                     | 1.26              |
| Br-doped  | 12.2320              | 7.6530 | 13.3796 | 1199.78                     | 1.48              |
| S-doped   | 12.2899              | 7.6266 | 13.3090 | 1194.91                     | 1.06              |
| Se-doped  | 12.2657              | 7.6460 | 13.3438 | 1199.24                     | 1.43              |
| Te-doped  | 12.2294              | 7.6819 | 13.3509 | 1201.59                     | 1.63              |

**Tab. S4** The lattice parameters of pure and different dopants in TiO<sub>2</sub>(B) using the GGA+*U* method.

| Structure | Lattice constants(Å) |        |         | Volume<br>(Å <sup>3</sup> ) | $\Delta V$<br>(%) |
|-----------|----------------------|--------|---------|-----------------------------|-------------------|
|           | a                    | b      | c       |                             |                   |
| Pure      | 12.5151              | 7.7777 | 13.2588 | 1234.36                     | -                 |
| N-doped   | 12.5112              | 7.7929 | 13.2702 | 1236.90                     | 0.21              |
| P-doped   | 12.4985              | 7.8373 | 13.3259 | 1250.36                     | 1.30              |
| As-doped  | 12.5046              | 7.8579 | 13.3247 | 1254.48                     | 1.63              |
| F-doped   | 12.5135              | 7.7936 | 13.2922 | 1239.78                     | 0.44              |
| Cl-doped  | 12.5287              | 7.8320 | 13.3315 | 1252.01                     | 1.43              |
| Br-doped  | 12.5211              | 7.8345 | 13.3774 | 1255.92                     | 1.75              |
| S-doped   | 12.4951              | 7.8416 | 13.3098 | 1248.40                     | 1.14              |
| Se-doped  | 12.4933              | 7.8630 | 13.3391 | 1254.67                     | 1.65              |
| Te-doped  | 12.4705              | 7.8900 | 13.3608 | 1258.21                     | 1.93              |

**Tab. S5** The effective mass of pure and different dopants in TiO<sub>2</sub>(B).

| Structure | Effective mass ( $m_0$ ) |        |              |        | Effective mass ( $m_0$ ) |              |              |              |
|-----------|--------------------------|--------|--------------|--------|--------------------------|--------------|--------------|--------------|
|           | Electrons                |        |              |        | Holes                    |              |              |              |
|           | G→F                      | F→Q    | Q→Z          | Z→G    | G→F                      | F→Q          | Q→Z          | Z→G          |
| Pure      | 1.016                    | 1.883  | <b>0.672</b> | 1.359  | 1.318                    | 0.895        | 8.682        | <b>0.808</b> |
| N-doped   | 1.156                    | 2.626  | <b>0.631</b> | 2.082  | 3.293                    | <b>1.060</b> | 4.250        | 1.508        |
| P-doped   | 0.485                    | 18.678 | <b>0.393</b> | 10.408 | 1.668                    | <b>1.201</b> | 4.638        | 2.922        |
| As-doped  | 0.516                    | 24.155 | <b>0.506</b> | 11.463 | 1.568                    | <b>1.260</b> | 5.052        | 3.319        |
| F-doped   | <b>0.504</b>             | 4.111  | 0.682        | 3.737  | 1.871                    | <b>0.938</b> | 1.950        | 1.372        |
| Cl-doped  | 2.605                    | 7.759  | <b>1.419</b> | 4.876  | 1.637                    | <b>1.185</b> | 1.288        | 3.324        |
| Br-doped  | <b>0.844</b>             | 11.843 | 0.853        | 19.833 | 3.770                    | <b>2.188</b> | 3.857        | 5.213        |
| S-doped   | 0.674                    | 6.168  | <b>0.478</b> | 4.985  | 1.718                    | 1.962        | <b>1.120</b> | 5.181        |
| Se-doped  | 0.851                    | 7.195  | <b>0.418</b> | 17.295 | 6.737                    | 1.160        | <b>0.385</b> | 4.879        |
| Te-doped  | <b>0.982</b>             | 37.481 | 3.337        | 8.224  | 4.533                    | <b>1.941</b> | 9.582        | 12.171       |

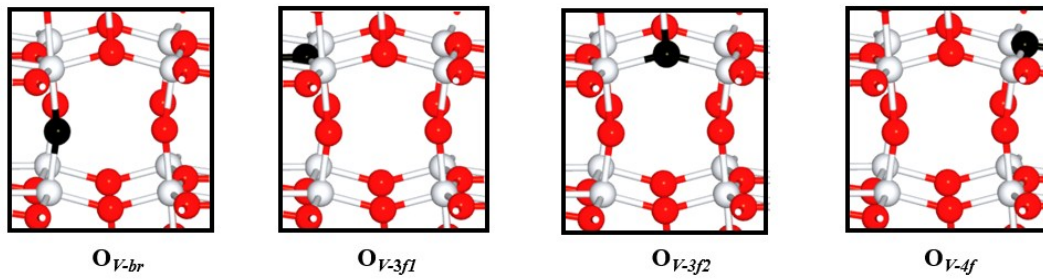

**Fig. S1** Various oxygen vacancies are enriched in the *b*-axis channel direction.

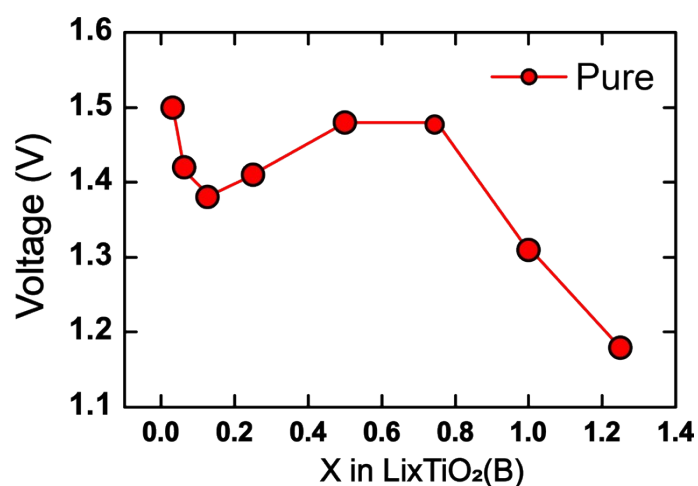

Fig. S2 The average equilibrium voltage of  $\text{TiO}_2(\text{B})$  in the lithiated state from low to high concentration was calculated using GGA+ $U$  method.

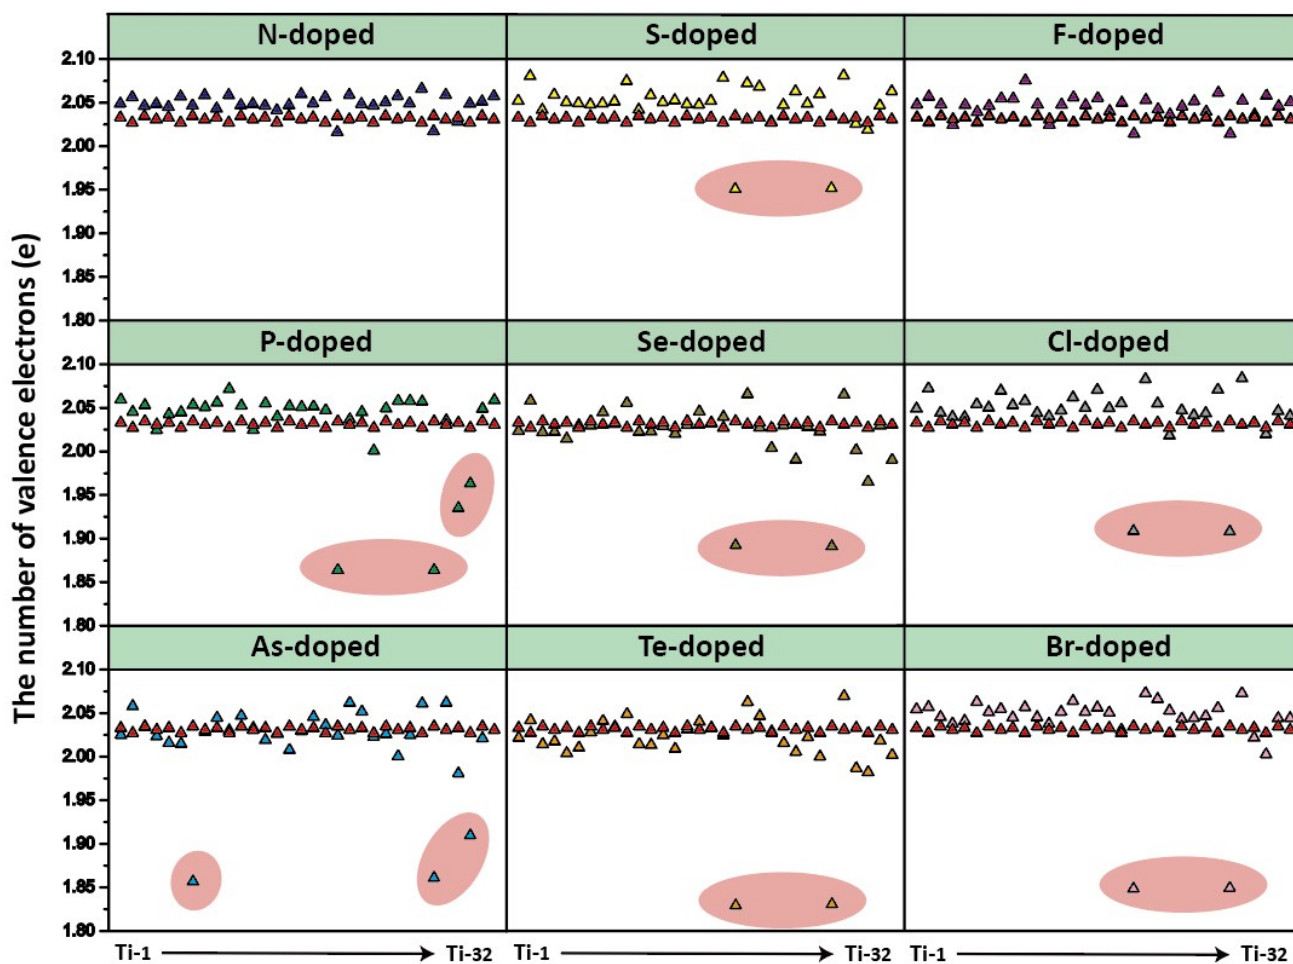

Fig. S3 The Bader charge of Ti atom for pure and doped  $\text{TiO}_2(\text{B})$ , and the red triangle represents the pure  $\text{TiO}_2(\text{B})$ .

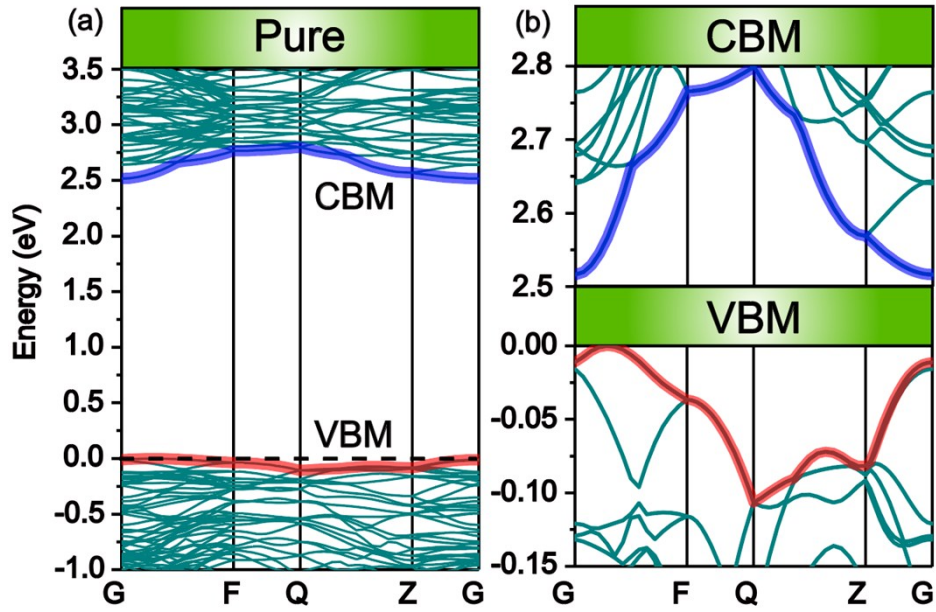

**Fig. S4** (a) Band structures of pure  $\text{TiO}_2(\text{B})$ . The dark cyan lines represent the contribution of the entire system. The bands projected to CBM and VBM are highlighted by blue and red lines. The horizontal black dashed lines indicate the  $E_F$ . (b) Contributions of CBM and VBM.

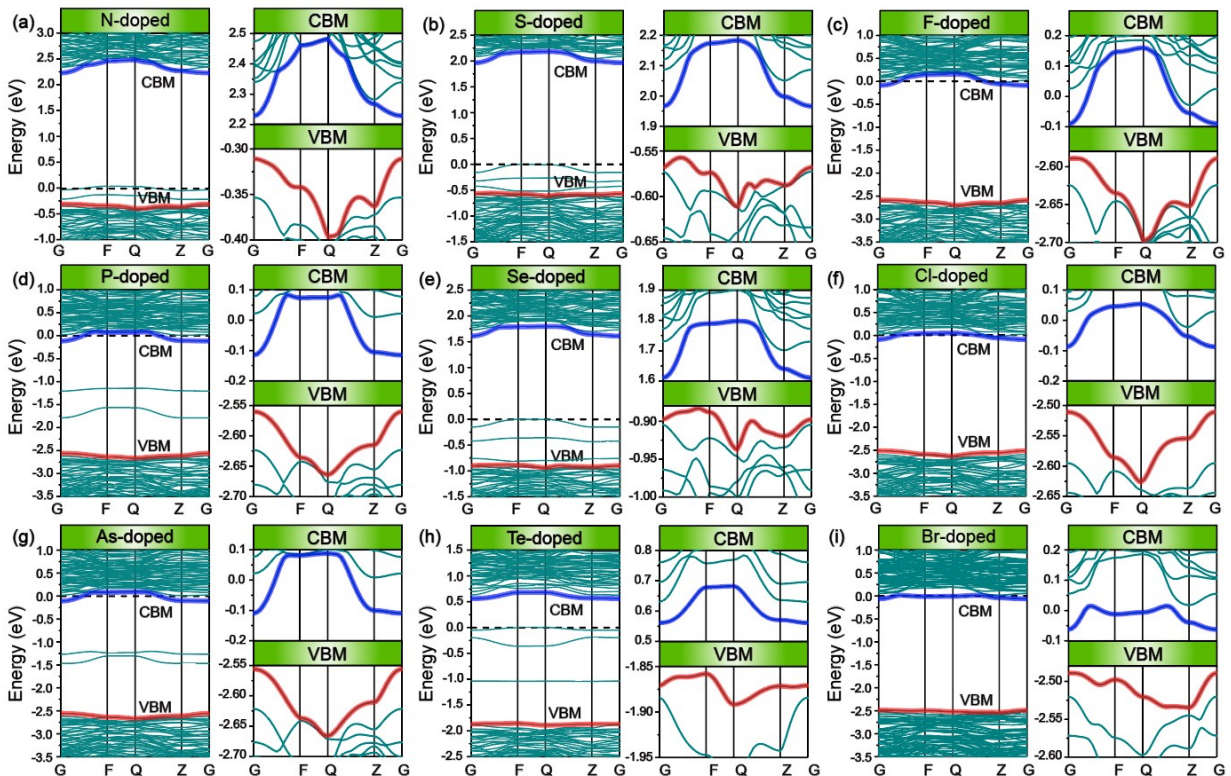

**Fig. S5** (a-i) Band structures of different dopants in  $\text{TiO}_2(\text{B})$ . The dark cyan lines represent the contribution of the entire system. The bands projected to CBM and VBM are highlighted by blue and red lines. The horizontal black dashed lines indicate the  $E_F$ .



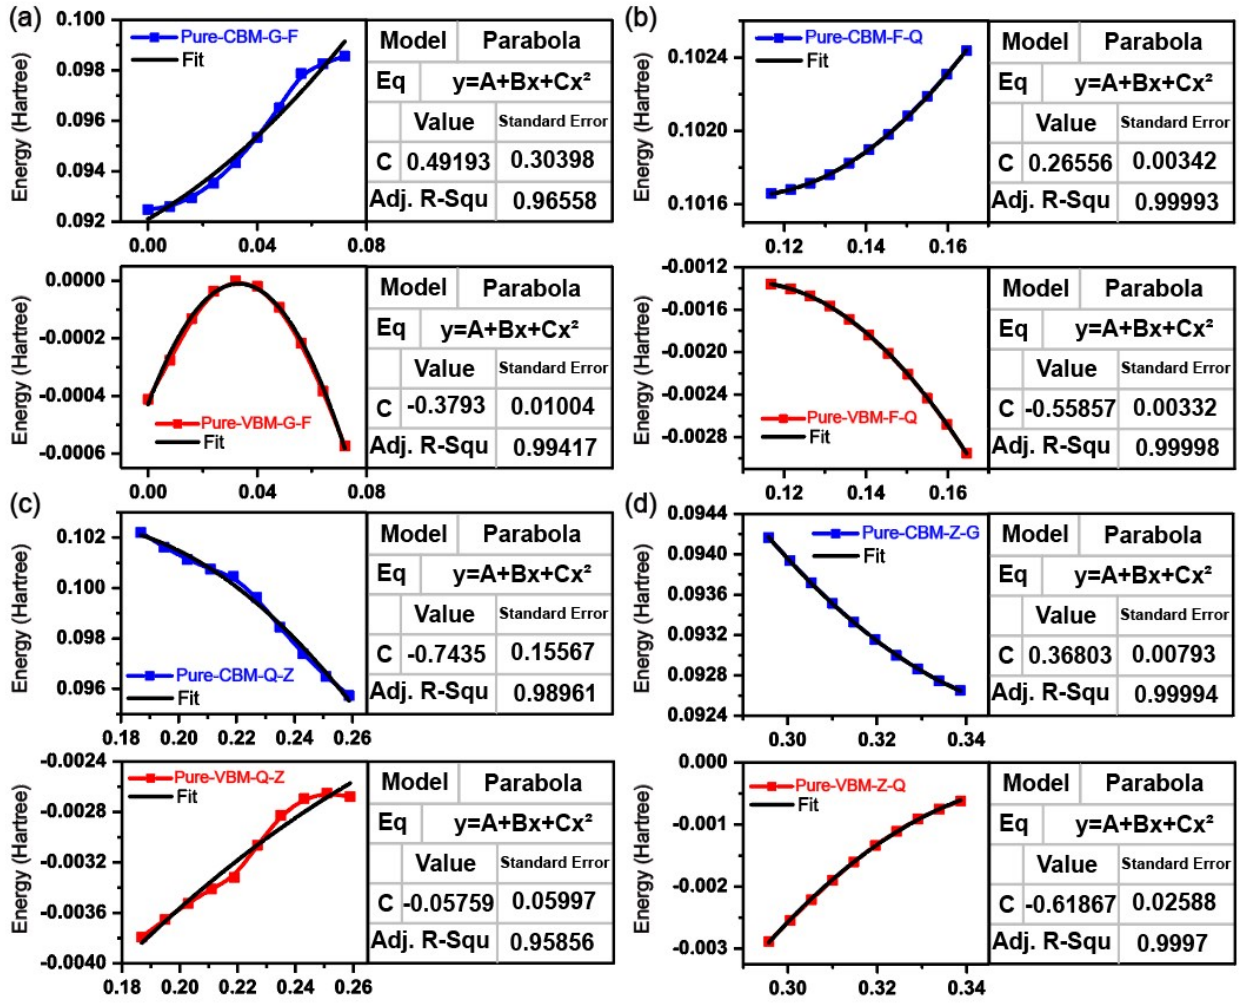

**Fig. S6** The CBM and VBM curves along the (a) G-F, (b) F-Q, (c) Q-Z and (d) Z-G direction in  $\text{TiO}_2(\text{B})$ . Black solid lines are the fitting curves. The table shows the fitting method, the quadratic C value and the standard error.

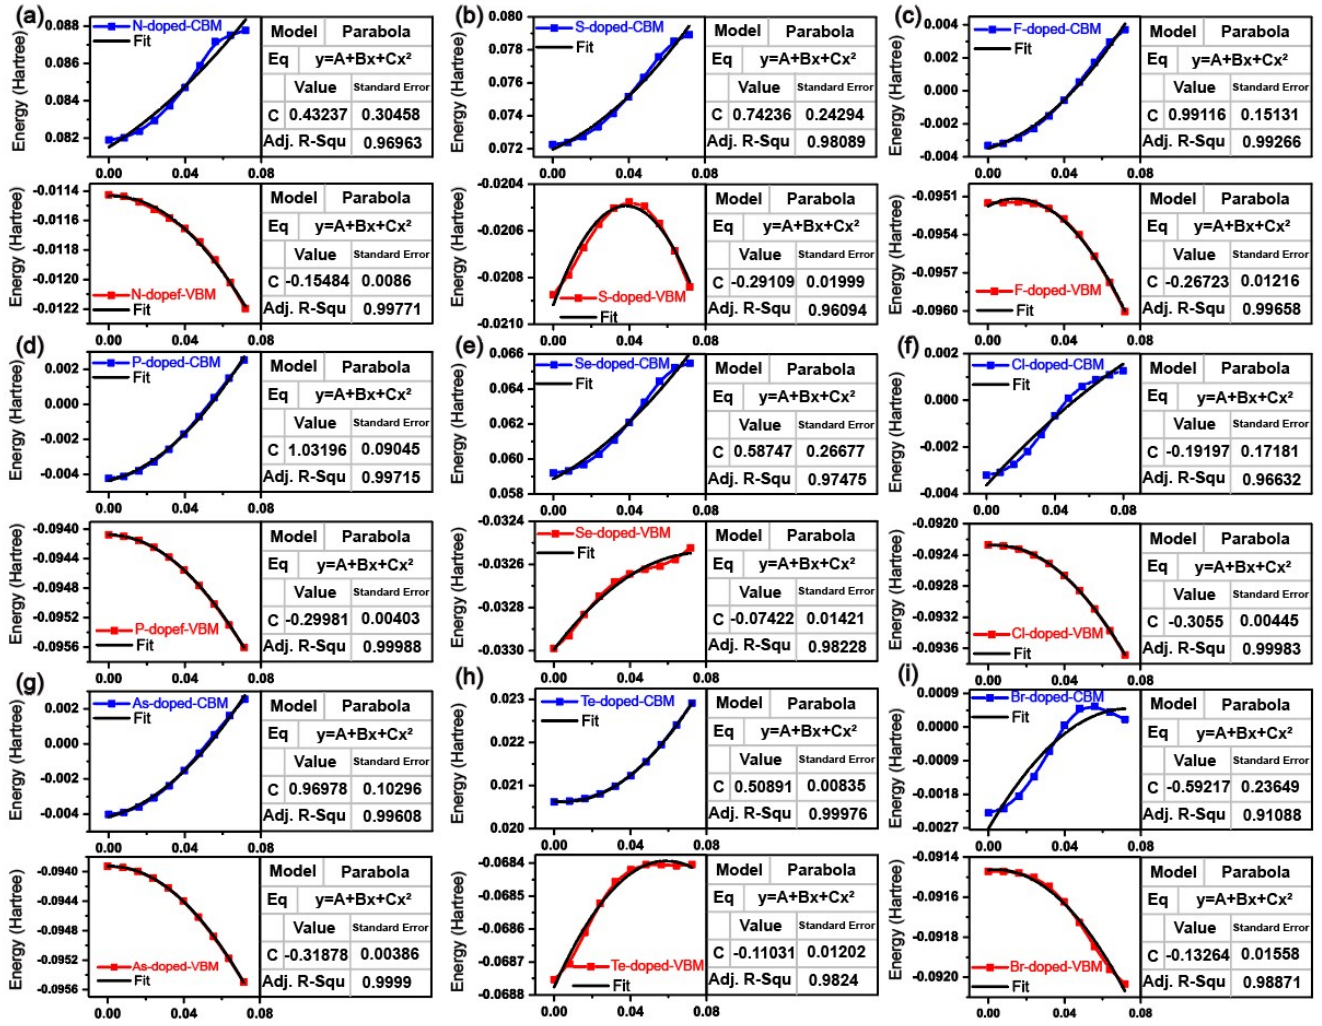

**Fig. S7** (a-i) The CBM and VBM curves along the G-F direction in different dopants  $\text{TiO}_2(\text{B})$ . Black solid lines are the fitting curves. The table shows the fitting method, the quadratic C value and the standard error.

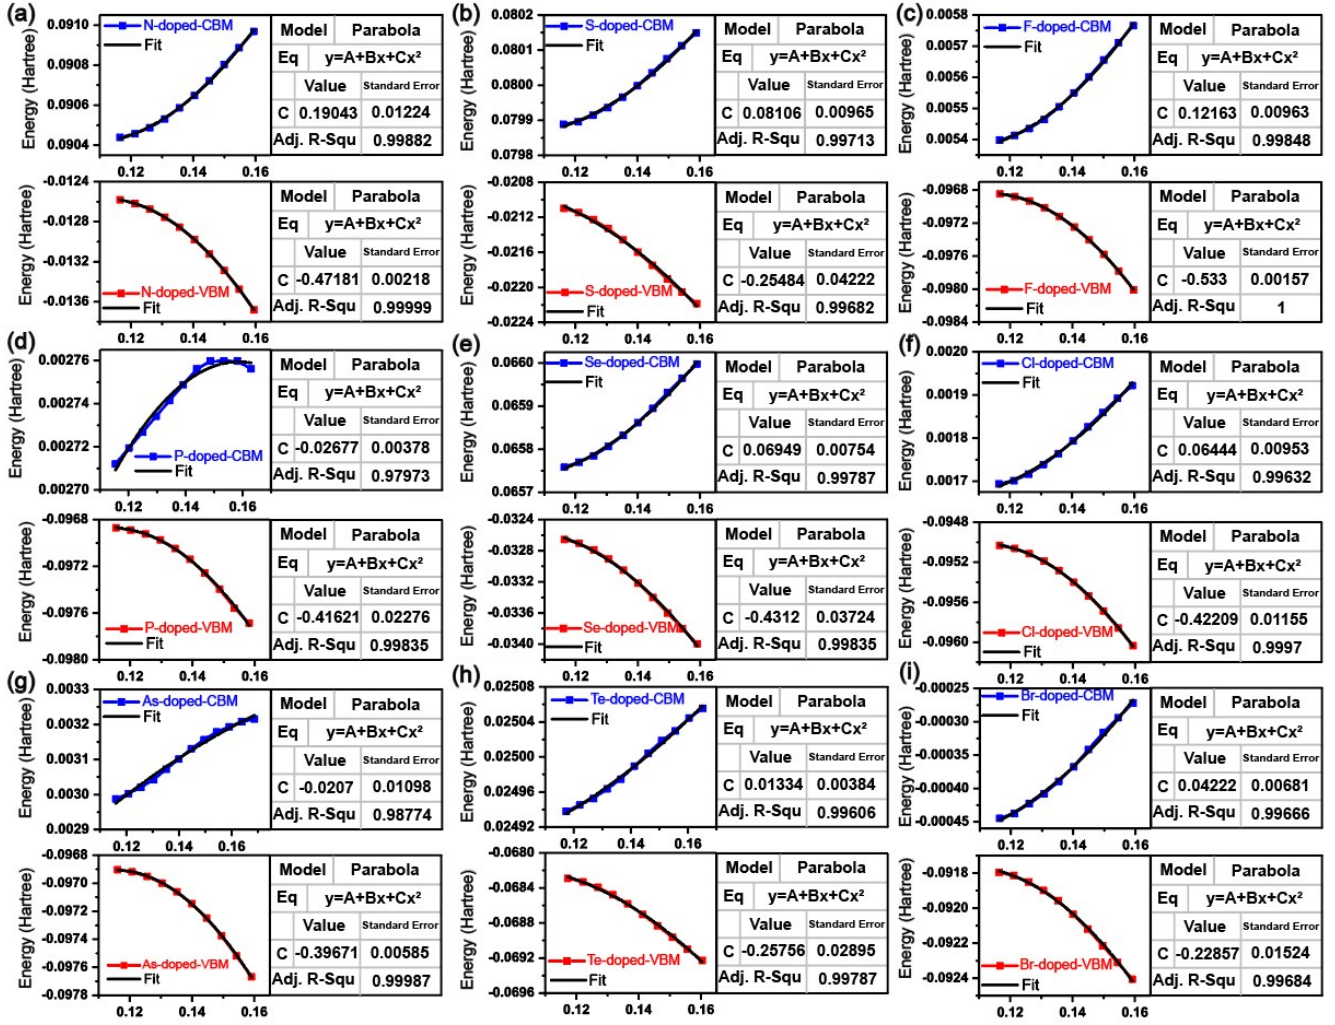

**Fig. S8** (a-i) The CBM and VBM curves along the F-Q direction in different dopants  $\text{TiO}_2(\text{B})$ . Black solid lines are the fitting curves. The table shows the fitting method, the quadratic C value and the standard error.



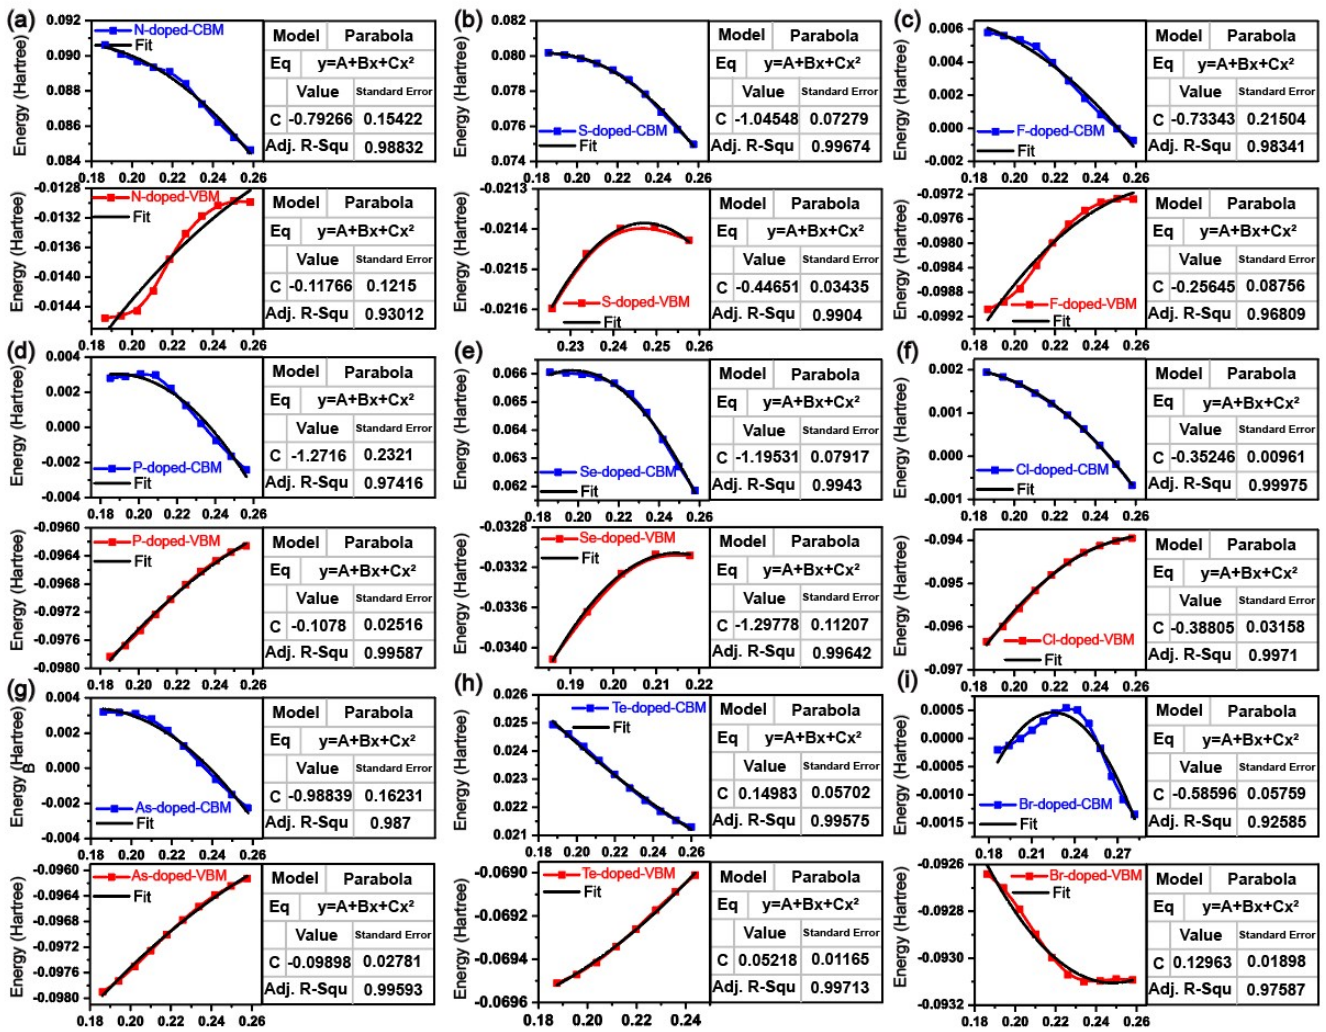

**Fig. S9** (a-i) The CBM and VBM curves along the Q-Z direction in different dopants  $\text{TiO}_2(\text{B})$ . Black solid lines are the fitting curves. The table shows the fitting method, the quadratic C value and the standard error.

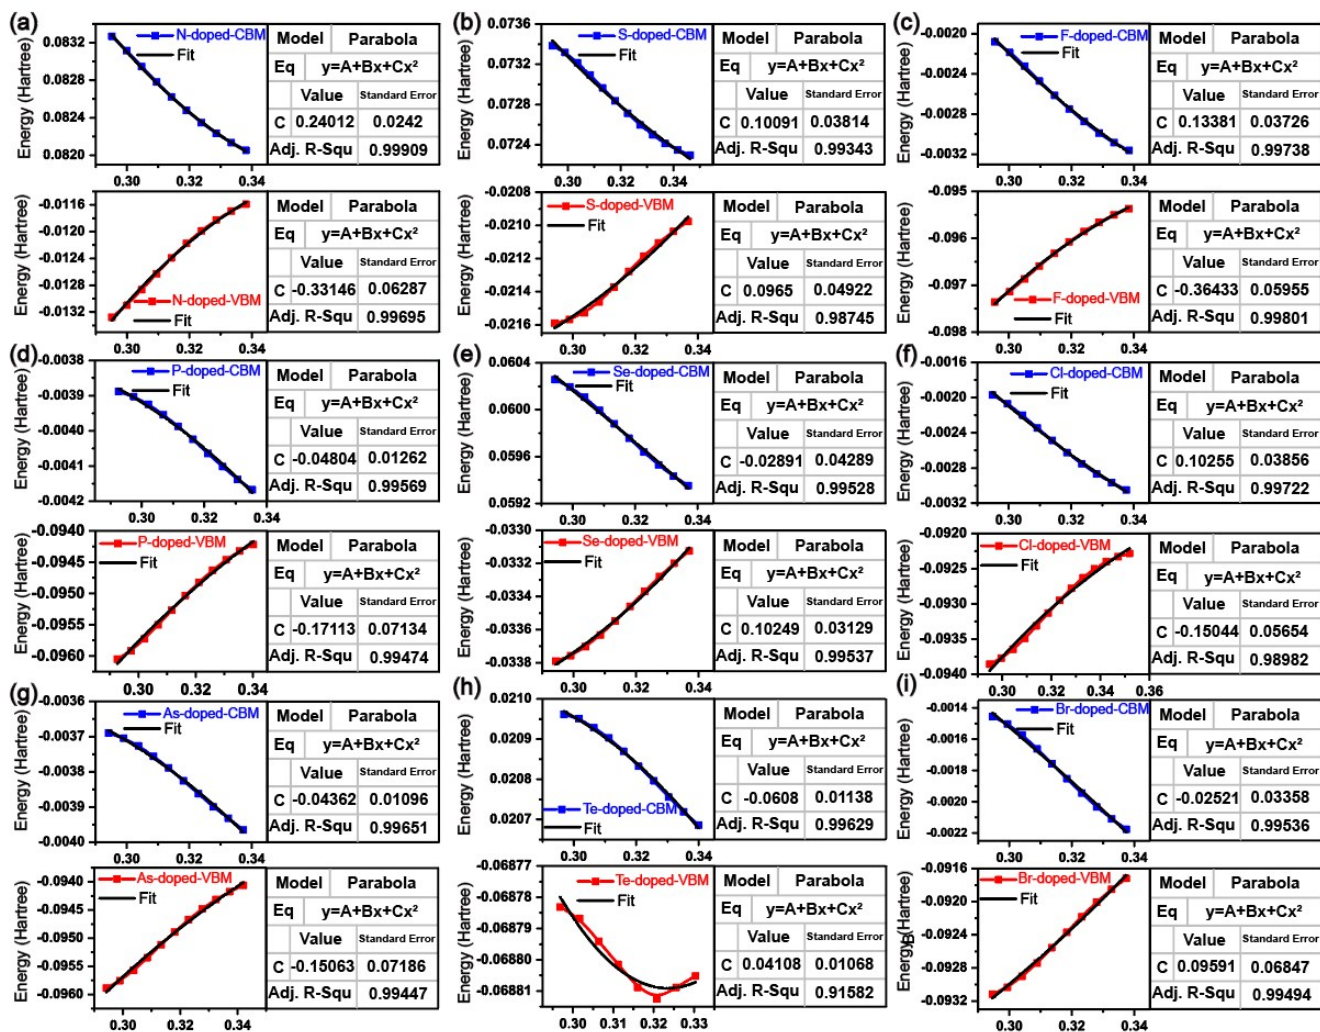

**Fig. S10** (a-i) The CBM and VBM curves along the Z-G direction in different dopants  $\text{TiO}_2(\text{B})$ . Black solid lines are the fitting curves. The table shows the fitting method, the quadratic C value and the standard error.

## Supplementary References

- 1 C. Arrouvel, S. C. Parker and M. S. Islam, *Chem. Mater.*, 2009, **21**, 4778-4783.
